# Supplementary material
Source: Springer Nature journal article supplement (https://www.springermedizin.de/resource/supplementary/12947_2013_482_MOESM6_ESM.pdf/9555846)

# Regional circumferential strain

Temporal smoothing

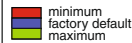

**A**

Anterior wall

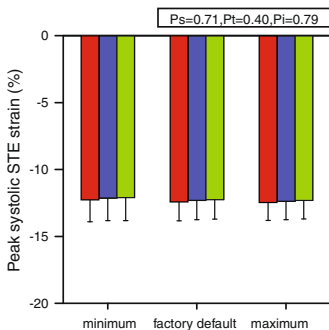

**B**

Posterior wall

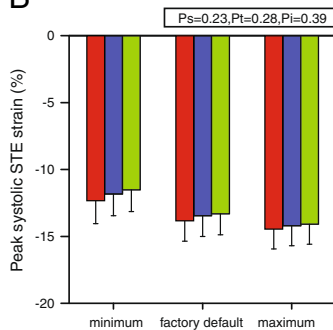

**C**

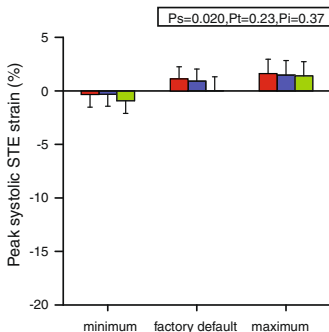

**D**

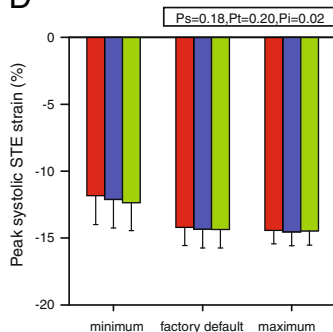

**E**

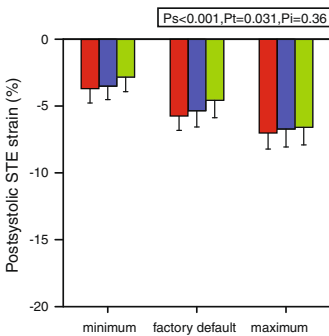

**F**

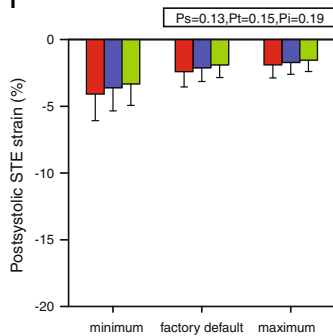

Supplement: MOESM6 [file 9555846]
